# Supplementary material
Source: HighWire-hosted journal article supplement (https://nutrition.bmj.com/content/4/2/405)
Supplement: inline-supplementary-material-8 [file inline-supplementary-material-8.pdf]

## Appendix 7: Teaching assessment form, used to rate their confidence in educating around nutrition from the template menu

### Teaching Kitchen, Kolkata

|                         |  |                       |  |
|-------------------------|--|-----------------------|--|
| <b>Unique code</b>      |  | <b>Date</b>           |  |
| <b>Participant Name</b> |  |                       |  |
| <b>Inner Wheel rep</b>  |  | <b>Trained mother</b> |  |

*This should be completed by the participating mothers with the assistance of a team member.*

#### Key

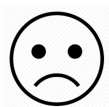

Not confident

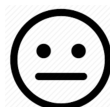

Average

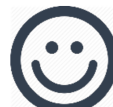

Good

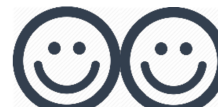

Excellent

In the table below, circle how confident you feel in relation to your skills in the following areas:

|                                                        |  |  |  |  |
|--------------------------------------------------------|--|--|--|--|
| <b>Food handling and overall hygiene</b>               |  |  |  |  |
| <b>Cooking skills</b>                                  |  |  |  |  |
| <b>Understanding the importance of a balanced diet</b> |  |  |  |  |
| <b>Retention of knowledge and skills gained</b>        |  |  |  |  |
| <b>Ability to explain and teach others</b>             |  |  |  |  |
