# Supplementary material
Source: HighWire-hosted journal article supplement (https://nutrition.bmj.com/content/4/2/405)

## Appendix 6: Summary diagram of the project with teaching and data collection points

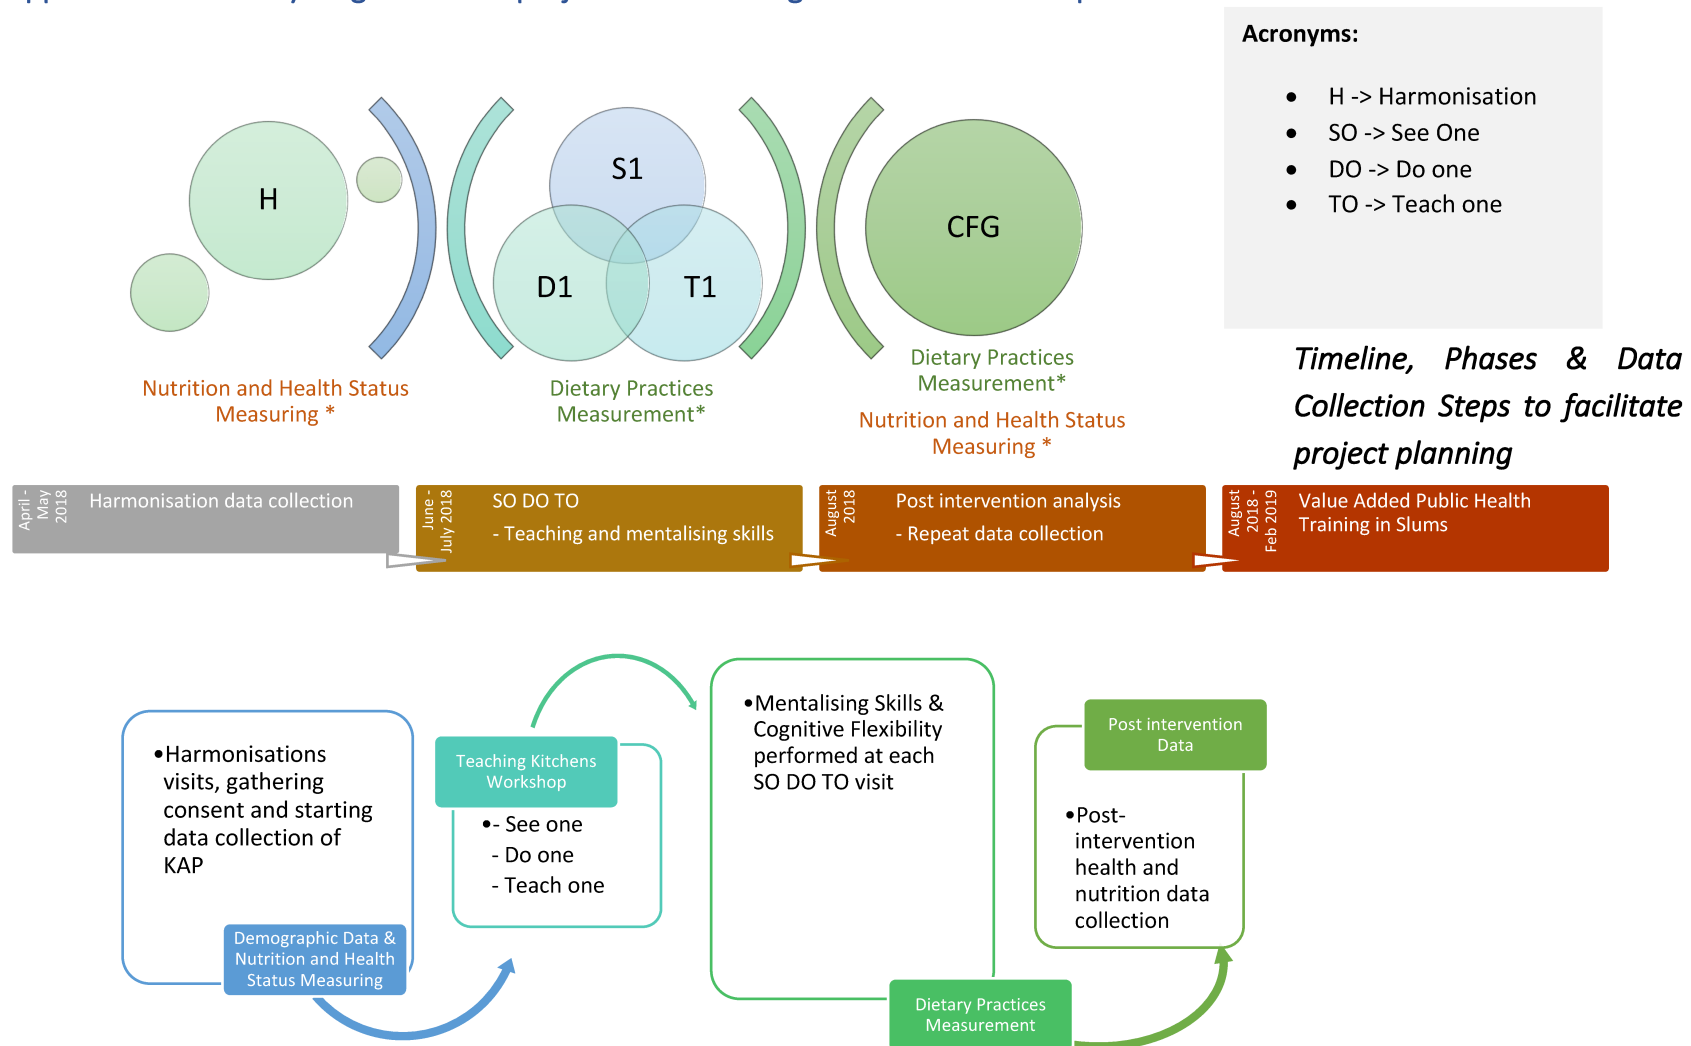

Supplement: inline-supplementary-material-6 [file inline-supplementary-material-6.pdf]
